# Supplementary material for: Defective TiO2-supported Cu nanoparticles as efficient and stable electrocatalysts for oxygen reduction in alkaline media
Source: Royal Society of Chemistry journal article supplement (doi:10.1039/c4nr06128d), 2014-11-28
Supplement: c4nr06128d1.pdf [file c4nr06128d1.pdf]

Electronic Supplementary Information

## Defective TiO<sub>2</sub>-supported Cu nanoparticles as efficient and stable electrocatalysts for oxygen reduction in alkaline media

Ke Liu, Yang Song, and Shaowei Chen\*

Department of Chemistry and Biochemistry, University of California, 1156 High Street, Santa Cruz, California 95064, USA. \* E-mail: [shaowei@ucsc.edu](mailto:shaowei@ucsc.edu)

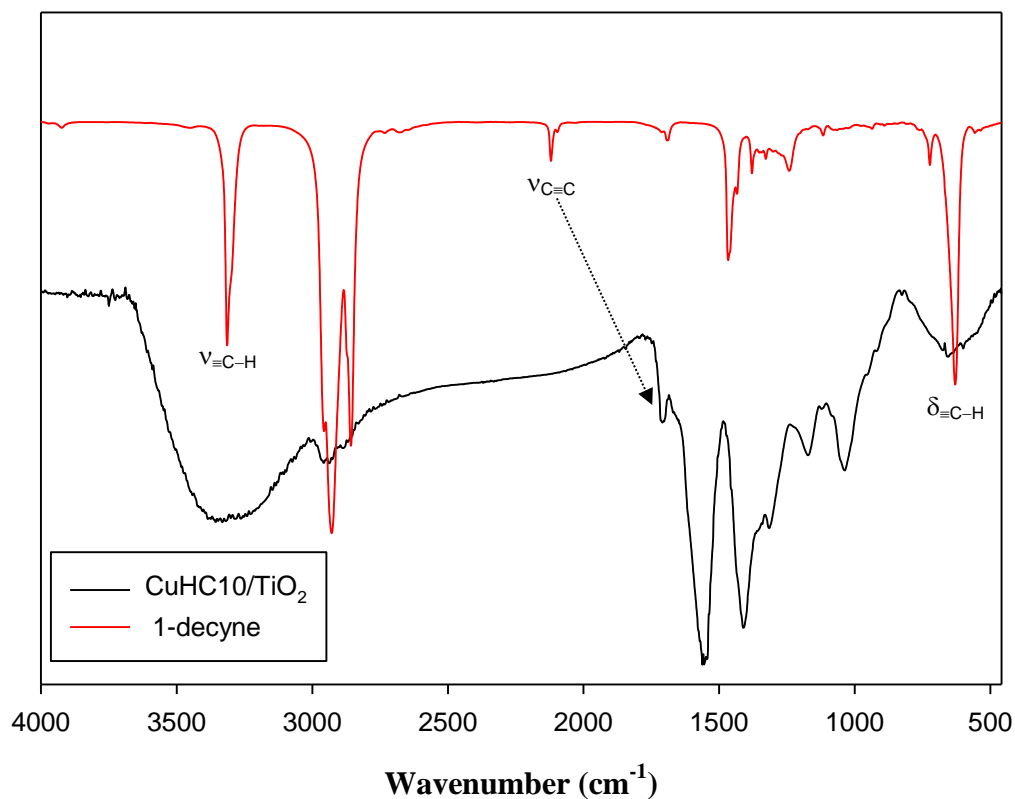

**Figure S1.** FTIR spectra of CuHC10/TiO<sub>2</sub> nanoparticle (black curve) and monomeric 1-decyne ligands (red curve).

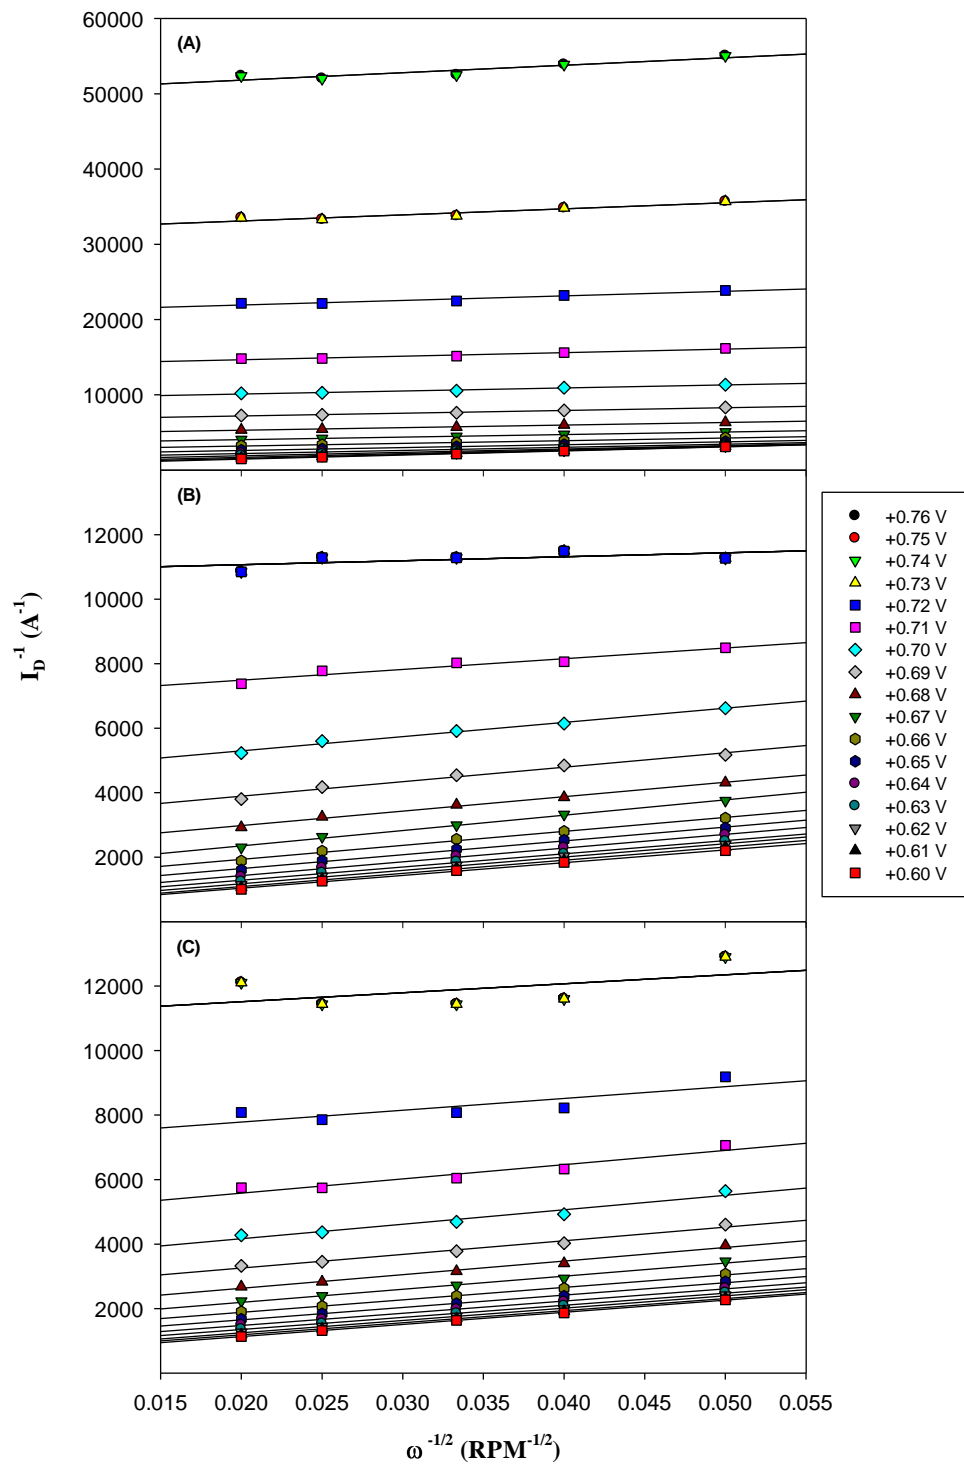

**Figure S2.** Koutecky-Levich plots of (A)  $\text{TiO}_2$ , (B)  $\text{Cu/TiO}_2$  and (C)  $\text{CuHC10/TiO}_2$  nanoparticles in an oxygen-saturated 0.1 M NaOH solution. Symbols were experimental data calculated from the RRDE voltammograms at 1600 rpm in Figure 5.
